# Supplementary material for: Continuous synthesis of high quality CdSe quantum dots in supercritical fluids
Source: Royal Society of Chemistry journal article supplement (doi:10.1039/c5tc01115a), 2015-01-01
Supplement: c5tc01115a1.pdf [file c5tc01115a1.pdf]

## Supporting information

---

### **Continuous synthesis of high quality CdSe quantum dots in supercritical fluids**

Arkajyoti Chakrabarty,<sup>a,b</sup> Samuel Marre,<sup>a</sup> Ryan Landis,<sup>c</sup> Vincent M. Rotello,<sup>c</sup> Uday Maitra,<sup>d</sup> André Del Guerso,<sup>b</sup>  
Cyril Aymonier<sup>a\*</sup>

Figure S1: Absorbance and PL spectra of CdSe QDs

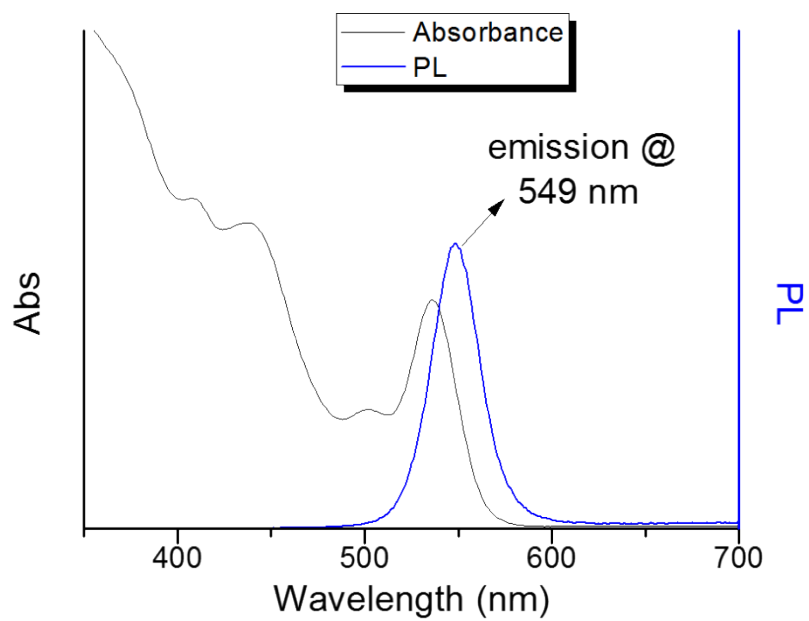

Figure S2: Excitation spectra of CdSe QDs

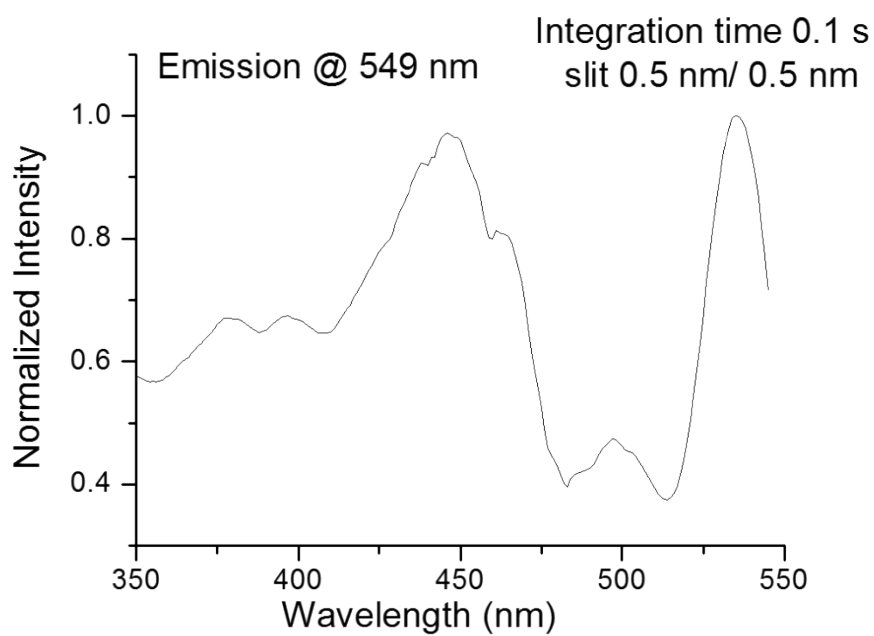

Figure S3: Ratio of Intensity in the excitation spectra and absorbance vs wavelength of CdSe QDs

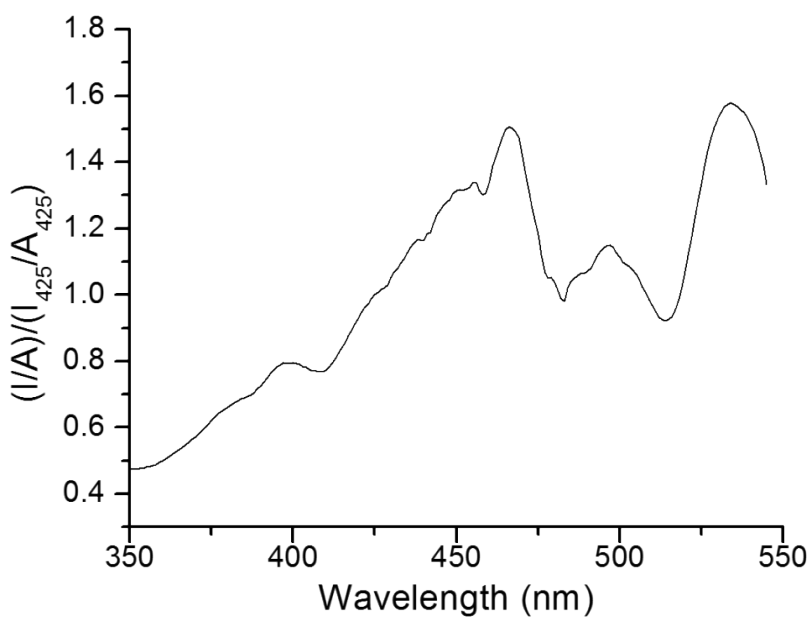

Figure S4: Quantum Yield vs wavelength of excitation of CdSe QDs

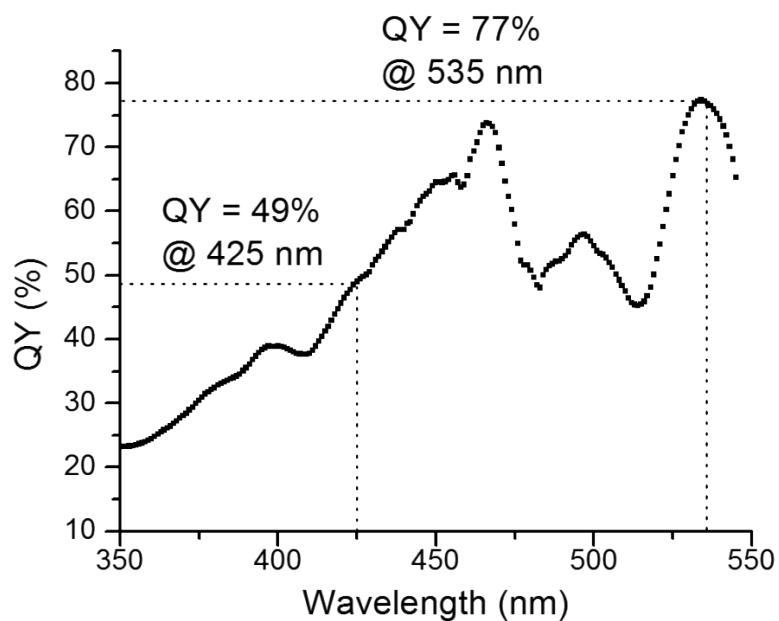

**Example of calculation of the CdSe QDs concentration obtained in supercritical fluids (case of CdSe QD558 – T = 250°C, R<sub>t</sub> = 60s)**

(Method demonstrated in: W. W. Yu, L. Qu, W. Guo and X. Peng, *Chem. Mater.*, 2003, **15**, 2854.)

The calculation is based on the Lambert-Beer's Law,  $A = \epsilon CL$ .

First, the 0.2 mL of the QDs initial solution is diluted to 3 mL for absorption measurements.

Then, the sizes of the quantum dots can be estimated from the absorption and PL peaks (here  $D = 2.9$  nm). Therefore,  $\epsilon$  can be estimated as:

$$\begin{aligned}\epsilon &= 5857 (D)^{2.65} \text{ (D = diameter of CdSe NCs)} \\ &= 5857 (2.9)^{2.65} \\ &= 98407 \text{ M}^{-1}\text{cm}^{-1}\end{aligned}$$

Finally, given that the absorbance value at first excitonic peak (544 nm) is equal to 0.48 and that  $L = 1$  cm, we can calculate C:

$$C_{\text{CdSemol}} = 4.87 \times 10^{-6} \text{ M}$$

The total weight of a CdSe QDs can be estimated as:

$$C_{\text{CdSewt}} = [(4/3) \times \pi \times r^3] \times \rho_{\text{CdSe}} \times C_{\text{CdSemol}} \times 6,023 \times 10^{23} \text{ g/L}$$

since  $\rho_{\text{CdSe}} = 5810 \text{ kg}\cdot\text{m}^{-3}$  and  $r = 2,9 / 2 = 1,45$  nm

Therefore, the concentration in mg/mL is: 0,218 mg/mL

Taking into the initial dilution factor:

$$C_{\text{CdSe}} = 3,264 \text{ mg/mL}$$

**Example of calculation of production rate:**

Considering the case of ZB CdSe NCs, the flowrates and precursor concentrations conditions used in this paper lead to a CdSe concentrations in the final solution almost constant at  $\sim 3.75 \text{ mg}\cdot\text{mL}^{-1}$ , which corresponds to  $\sim 70\%$  conversion. Therefore, the production rate will depend on the residence time needed to grow up the CdSe QDs. As a matter of fact, the flowrate required to produce a certain size will depend on the residence time required to grow up this particular size. As mentioned

previously, the flowrate ( $Q$  in  $\text{m}^3 \cdot \text{s}^{-1}$ ) can be calculated as:  $Q = (V/R_t) \cdot (\rho_{\text{cond}}/\rho_{\text{pump}})$ . Given that the current reactor has an internal volume of 1,27 mL ( $V$ ) and that the hexane density at 10 MPa in the pump ( $\rho_{\text{pump}}$ ) and in conditions ( $\rho_{\text{cond}}$ ) are 665 and 434  $\text{kg} \cdot \text{m}^{-3}$ , respectively, and considering a residence time of 5s ( $R_t$ ), the required flowrate is 983  $\mu\text{L} \cdot \text{min}^{-1}$ , *i.e.* 59  $\text{mL} \cdot \text{h}^{-1}$ . By multiplying this value by the weight concentration (3.75  $\text{mg} \cdot \text{mL}^{-1}$ ), we can calculate a production rate of  $\sim 220 \text{ mg} \cdot \text{h}^{-1}$ . However, considering a required residence time of 50s, the production rate will drop to  $\sim 22 \text{ mg} \cdot \text{h}^{-1}$ . Therefore, small blue-green QDs, which do not require long residence time, will be easier to produce in large quantities.
